# Supplementary material for: Macrocycle synthesis by trimerization of boronic acids around a hexaol template, and recognition of polyols by resulting macrocyclic oligoboronic acids
Source: Royal Society of Chemistry journal article supplement (doi:10.1039/c3ob40554k), 2013-01-01

# Macrocycle synthesis by trimerization of boronic acids around a hexaol template, and recognition of polyols by resulting macrocyclic oligoboronic acids

Dennis Stoltenberg and Ulrich Lüning

5

<sup>13</sup>C-NMR of triester **13a**      **Figure 1**

<sup>13</sup>C-NMR of triester **13b**      **Figure 2**

<sup>13</sup>C-NMR of triester **13c**      **Figure 3**

<sup>13</sup>C-NMR of triester **13d**      **Figure 4**

10 <sup>13</sup>C-NMR of triester **14a**      **Figure 5**

<sup>13</sup>C-NMR of triester **14b**      **Figure 6**

<sup>13</sup>C-NMR of triester **16**      **Figure 7**

<sup>13</sup>C-NMR of triester **17**      **Figure 8**

15

**Figure 1.**  $^{13}\text{C}$ -NMR of triester **13a**

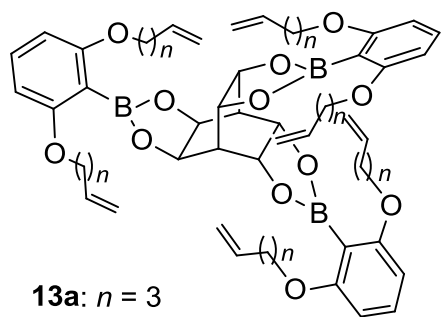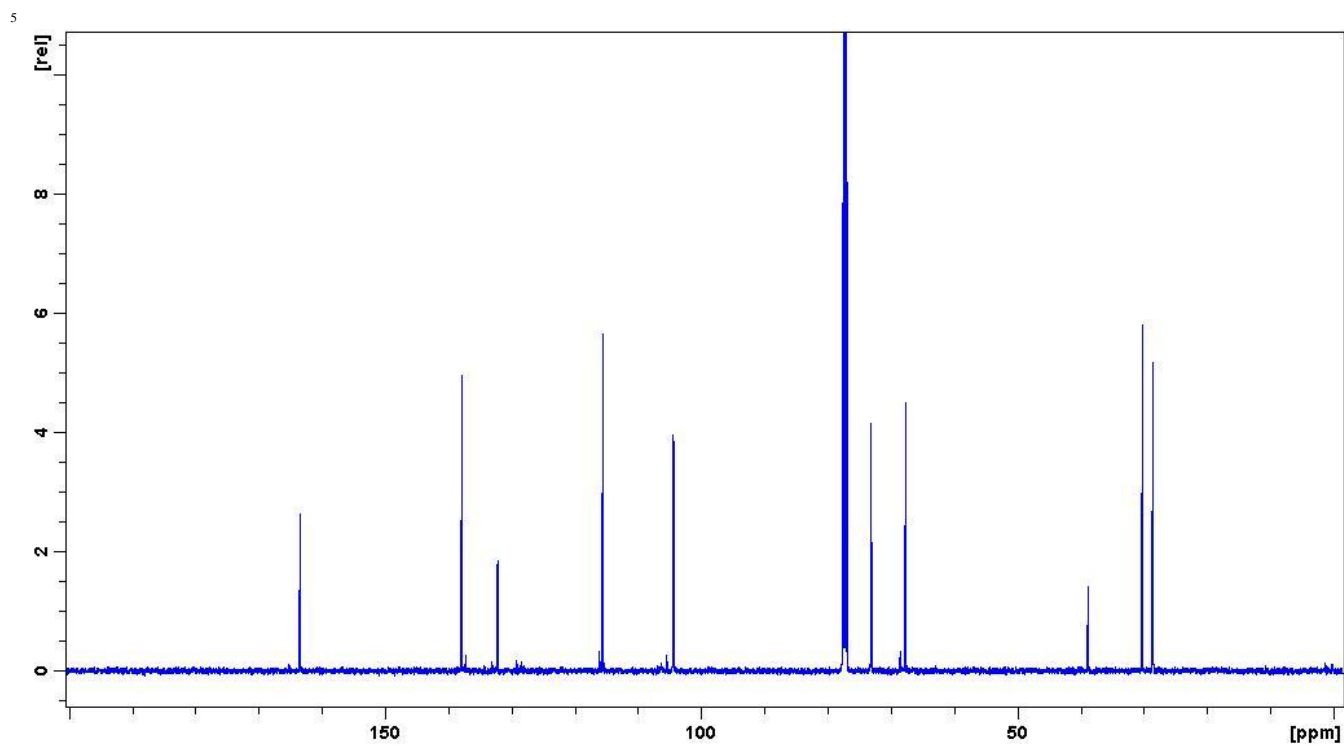

**Figure 2.**  $^{13}\text{C}$ -NMR of triester **13b**

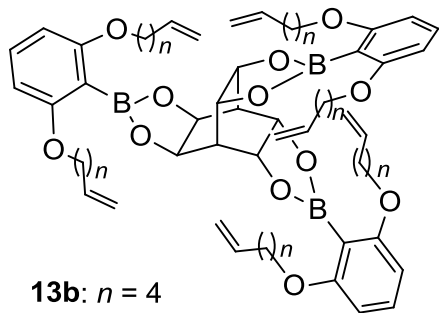

**13b:**  $n = 4$

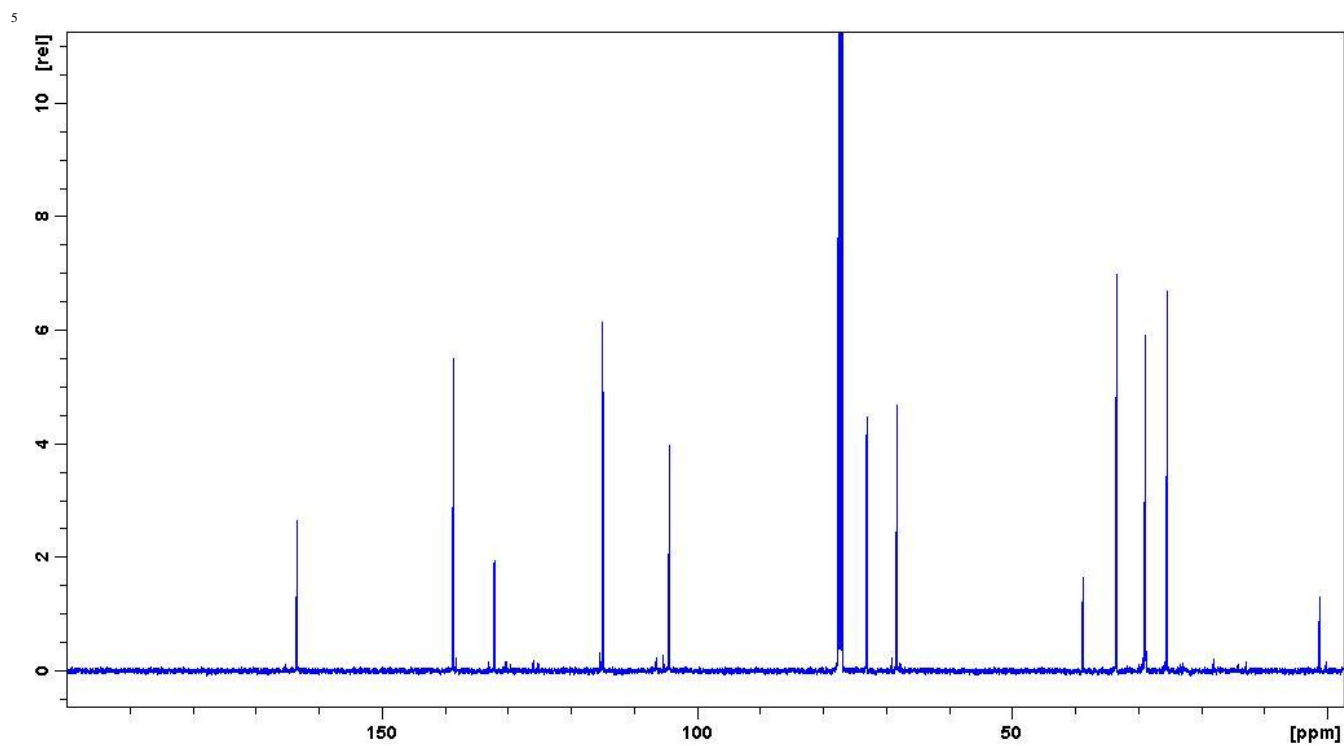

**Figure 3.**  $^{13}\text{C}$ -NMR of triester **13c**

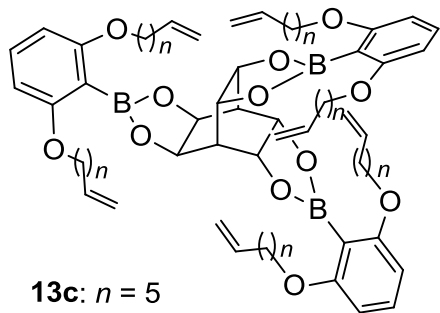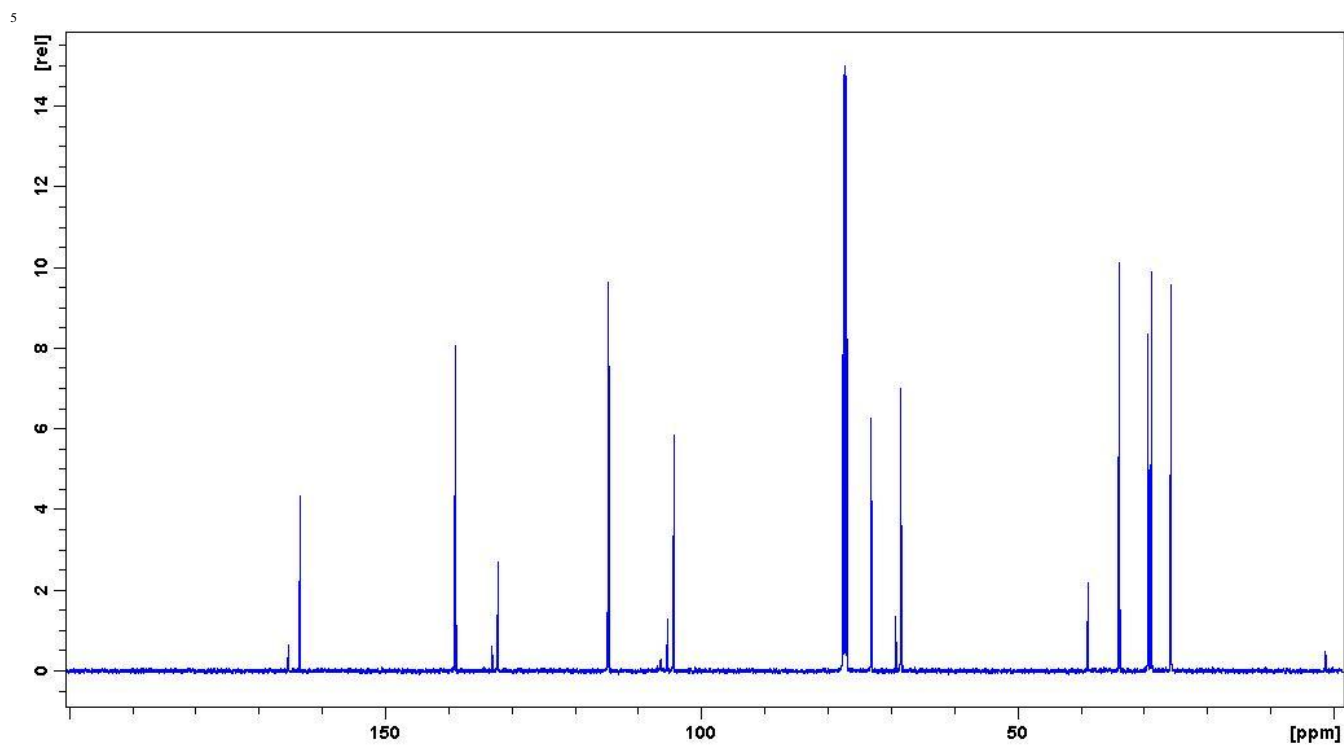

**Figure 4.**  $^{13}\text{C}$ -NMR of triester **13d**

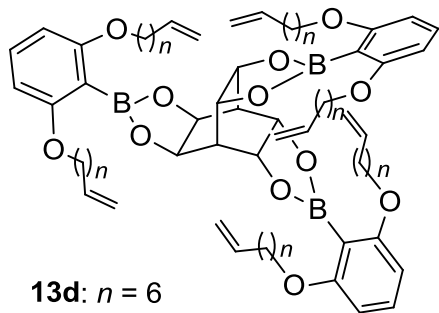

**13d:**  $n = 6$

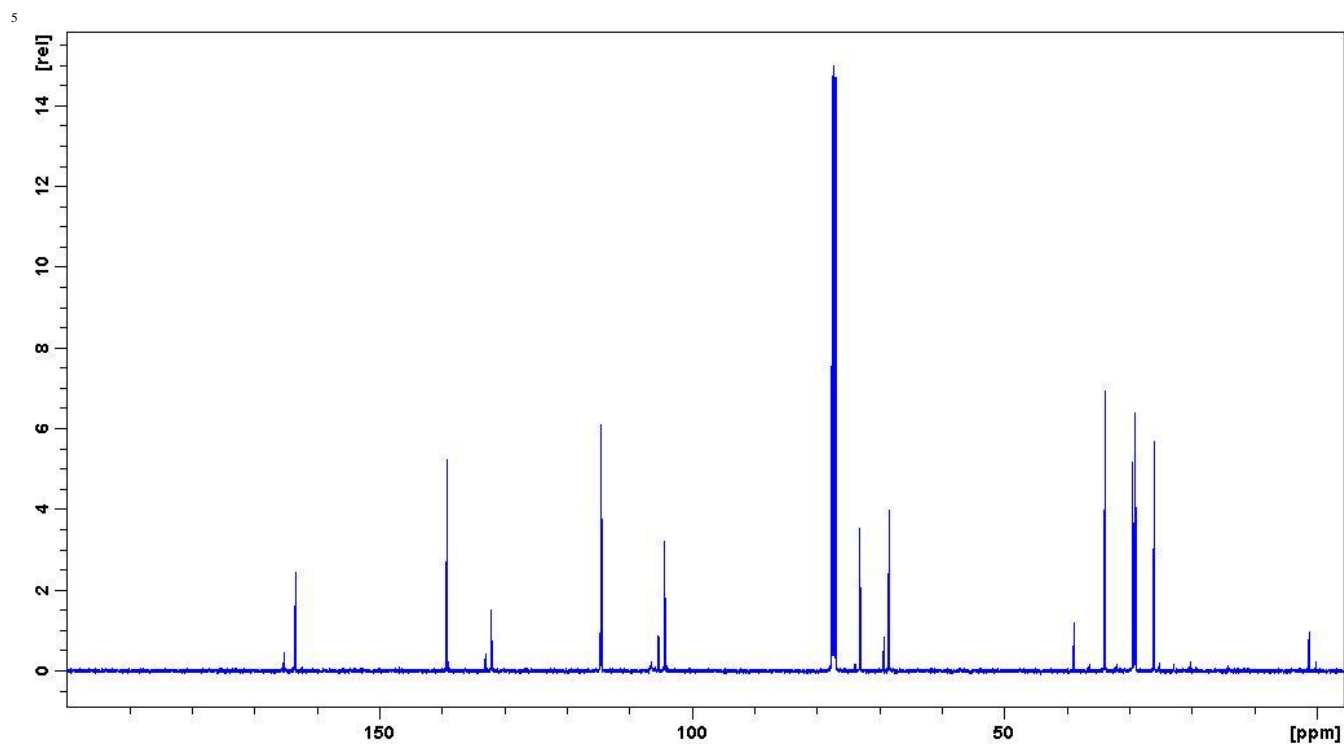

**Figure 5.**  $^{13}\text{C}$ -NMR of triester **14a**

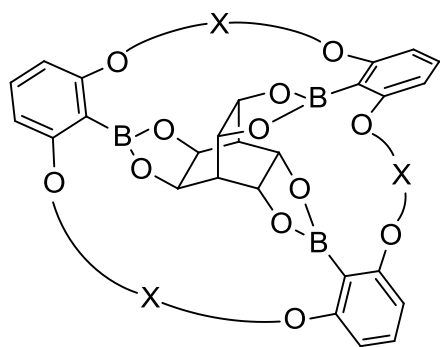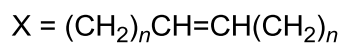

**14a:**  $n = 3$

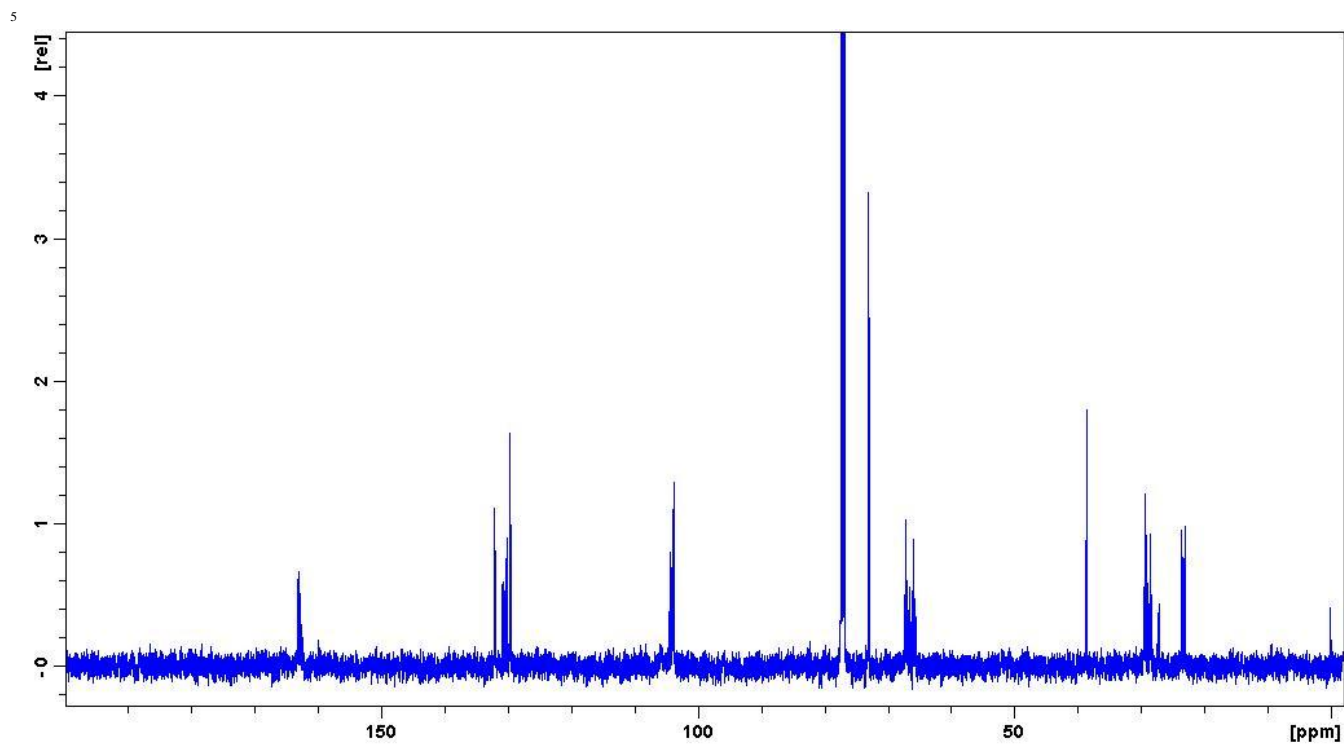

**Figure 6.**  $^{13}\text{C}$ -NMR of triester **14b**

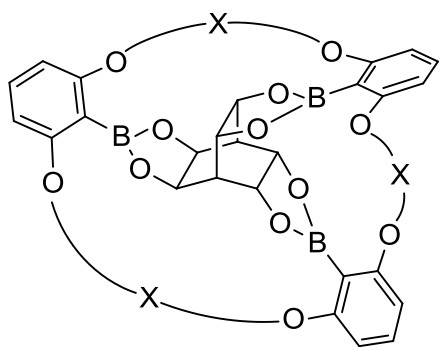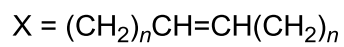

**14b:**  $n = 4$

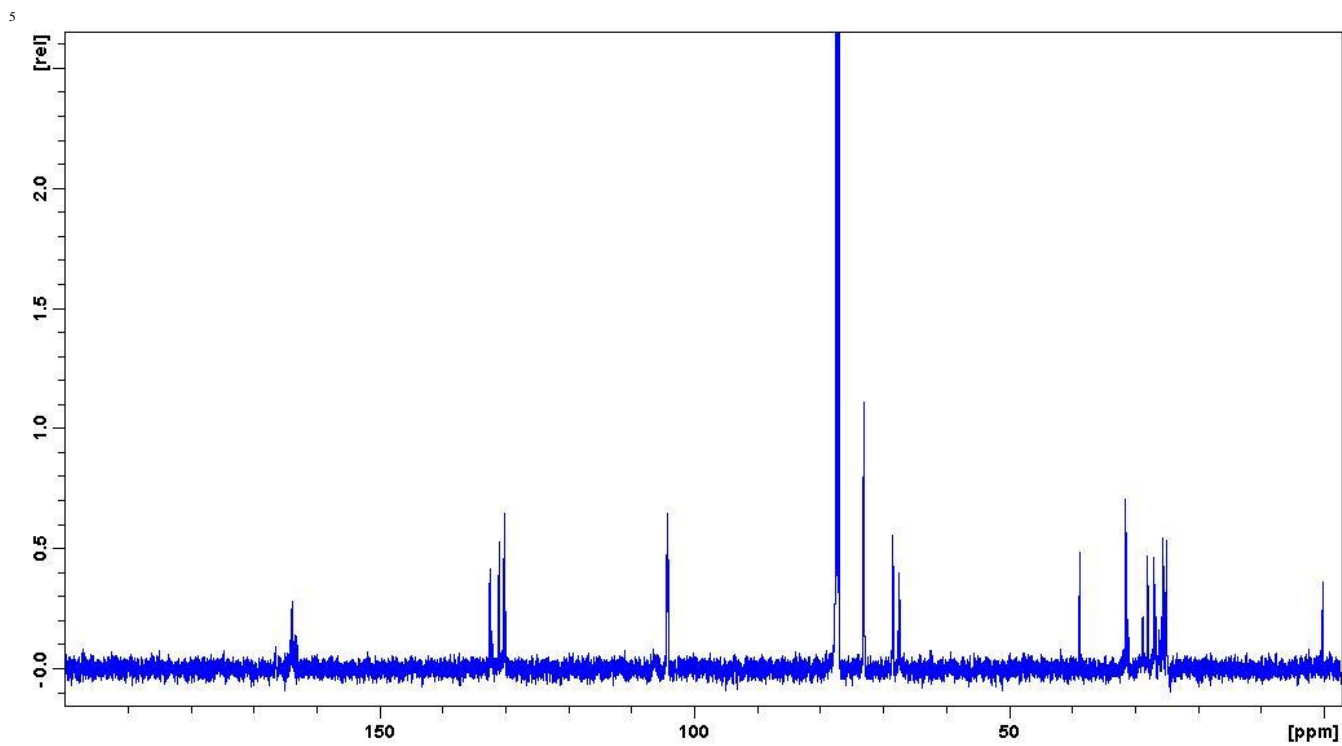

**Figure 7.**  $^{13}\text{C}$ -NMR of triester **16**

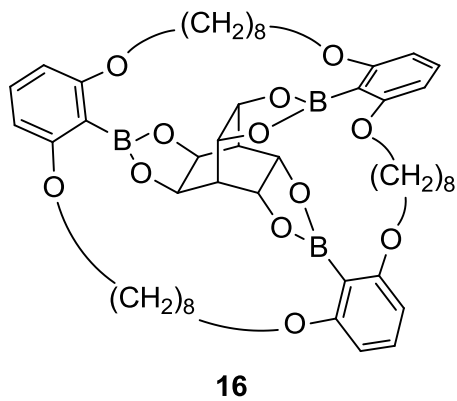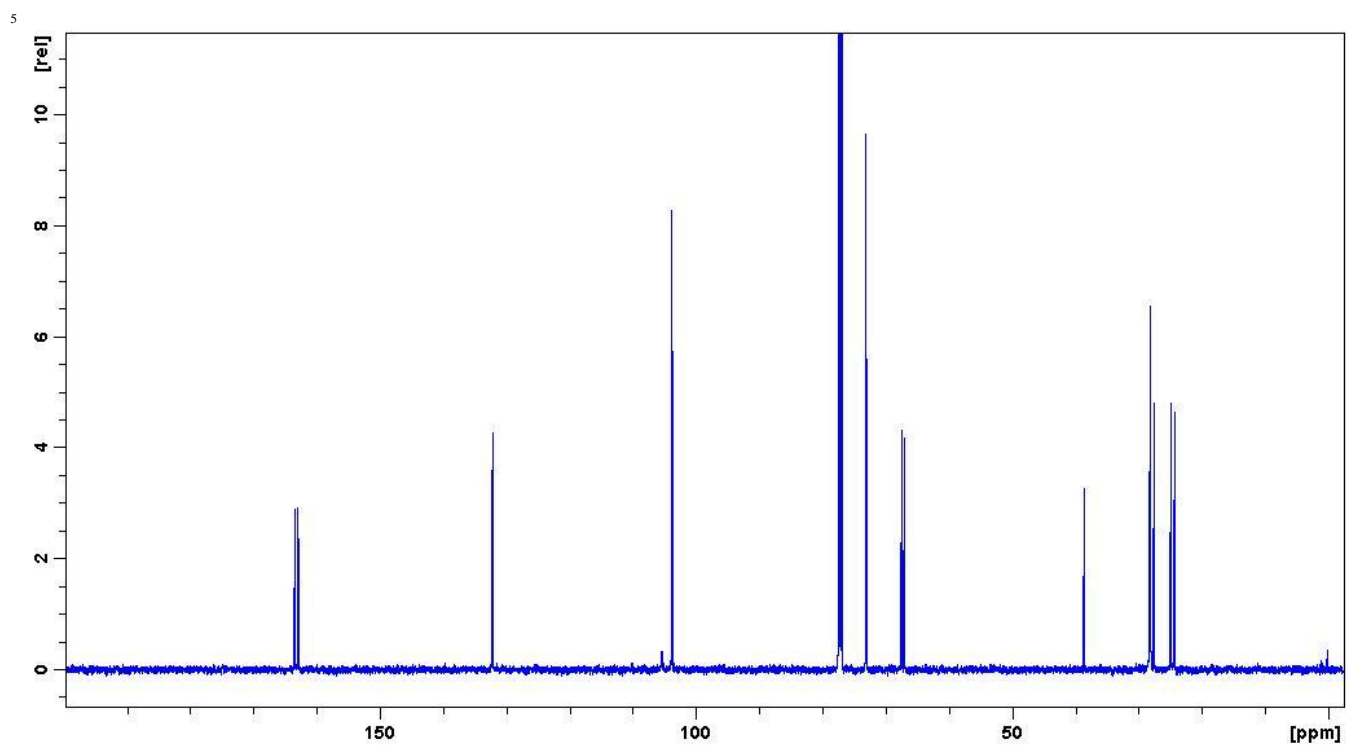



**Figure 8.**  $^{13}\text{C}$ -NMR of triester **17**

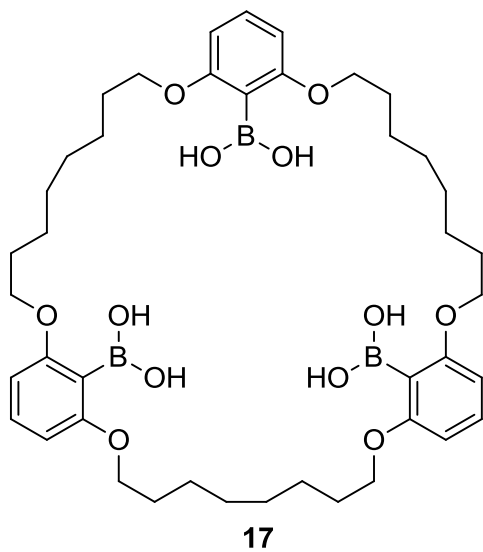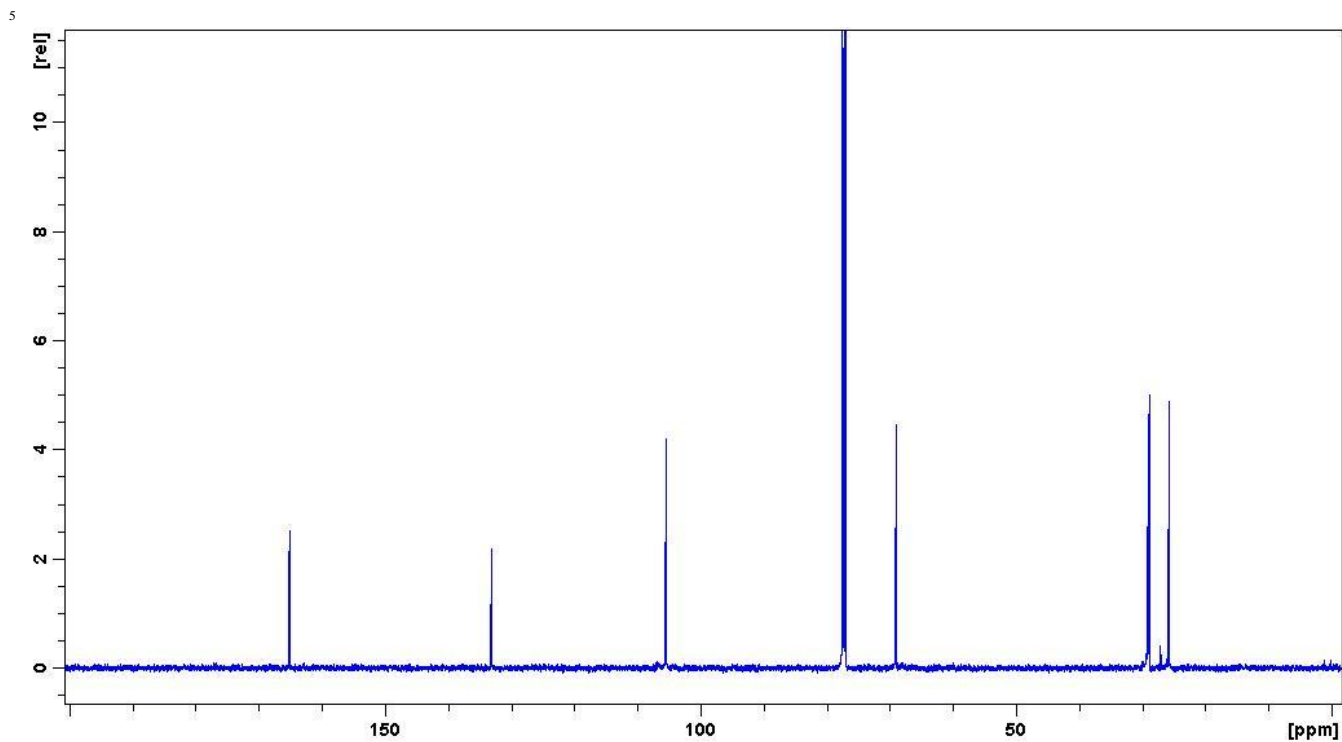

Supplement: c3ob40554k.pdf [file c3ob40554k.pdf]
